# Supplementary material for: 17β-Estradiol Modulates Gene Expression in the Female Mouse Cerebral Cortex
Source: PubMed Central journal article supplement (PMC4221195; doi:10.1371/journal.pone.0111975), 2014-11-05
Supplement: pone.0111975.s001.pdf [file pone.0111975.s001.pdf]

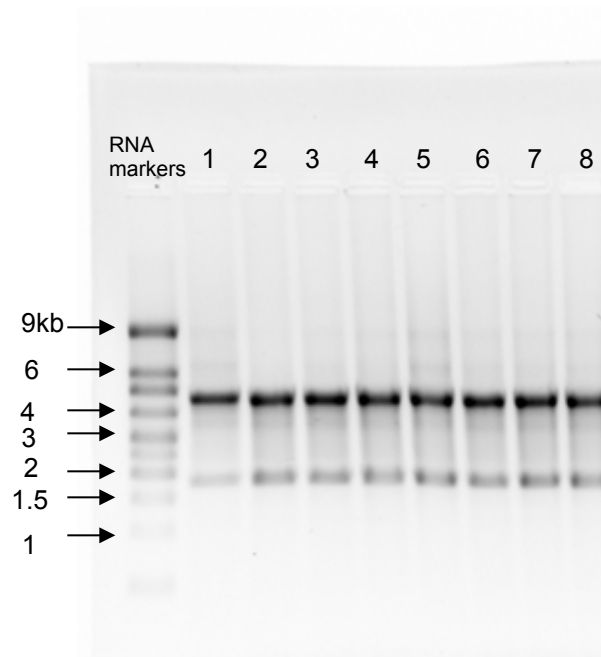

**Figure S1. RNA gel demonstrating intact RNA samples.** Native agarose gel electrophoresis was used to resolve the intact 28s and 18s rRNA bands. 2ug of RNA were run per lane.
